# Supplementary material
Source: Springer Nature journal article supplement (https://www.springermedizin.de/resource/supplementary/13048_2014_247_MOESM3_ESM.pdf/9665212)

A

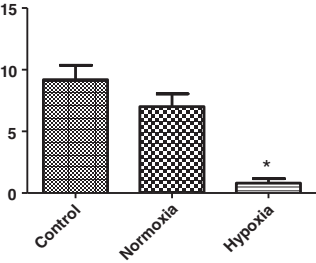

B

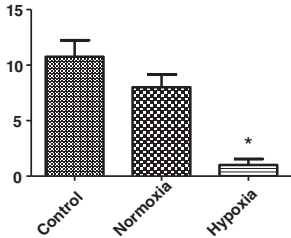

C

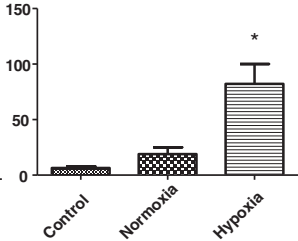

Supplement: MOESM3 [file 9665212]
